# Supplementary material
Source: PubMed Central journal article supplement (PMC5038047)
Supplement: AEM.01207-16_zam999117439so1.pdf [file AEM.01207-16_zam999117439so1.pdf]

## Supplementary Information

### **Physiological and proteomic responses of continuous cultures of *Microcystis aeruginosa* PCC 7806 to changes in iron bioavailability and growth rate**

Anna C. Y. Yeung,<sup>a,b</sup> Paul M. D'Agostino,<sup>b,c</sup> Anne Poljak,<sup>d</sup> James McDonald,<sup>a</sup> Mark W.  
Bligh,<sup>a</sup> T. David Waite,<sup>a</sup> and Brett A. Neilan,<sup>b,#</sup>

School of Civil and Environmental Engineering, UNSW, Sydney, NSW, Australia<sup>a</sup>; School  
of Biomolecular and Biosciences, UNSW, Sydney, NSW, Australia<sup>b</sup>; Department of  
Chemistry, Technische Universität München, Garching, Bayern, Germany<sup>c</sup>; Bioanalytical  
Mass Spectrometry Facility, UNSW, Sydney, NSW, Australia<sup>d</sup>

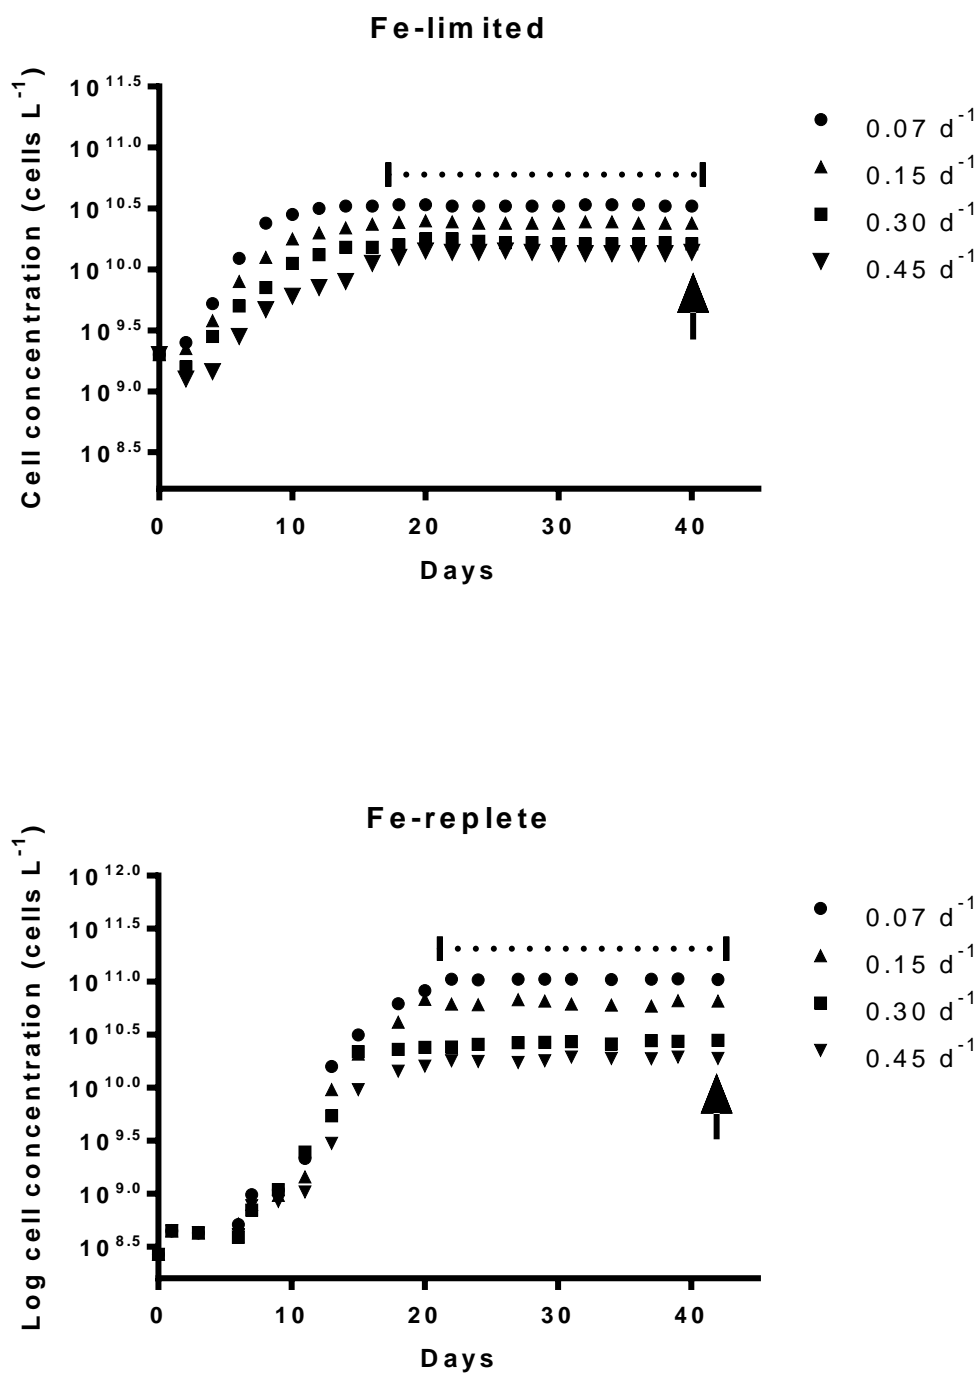

**Figure S1. Growth of *M. aeruginosa* PCC 7806 in Fe-limited (top) and Fe-replete (bottom) chemostats.** The dotted lines on the graph represent steady state where cell counts at subsequent samplings were within the 95% CI. The arrows mark the days when chemostat cultures were harvested (Fe-limited: Day 40, Fe-replete: Day 42) for physiological and proteomic analyses.

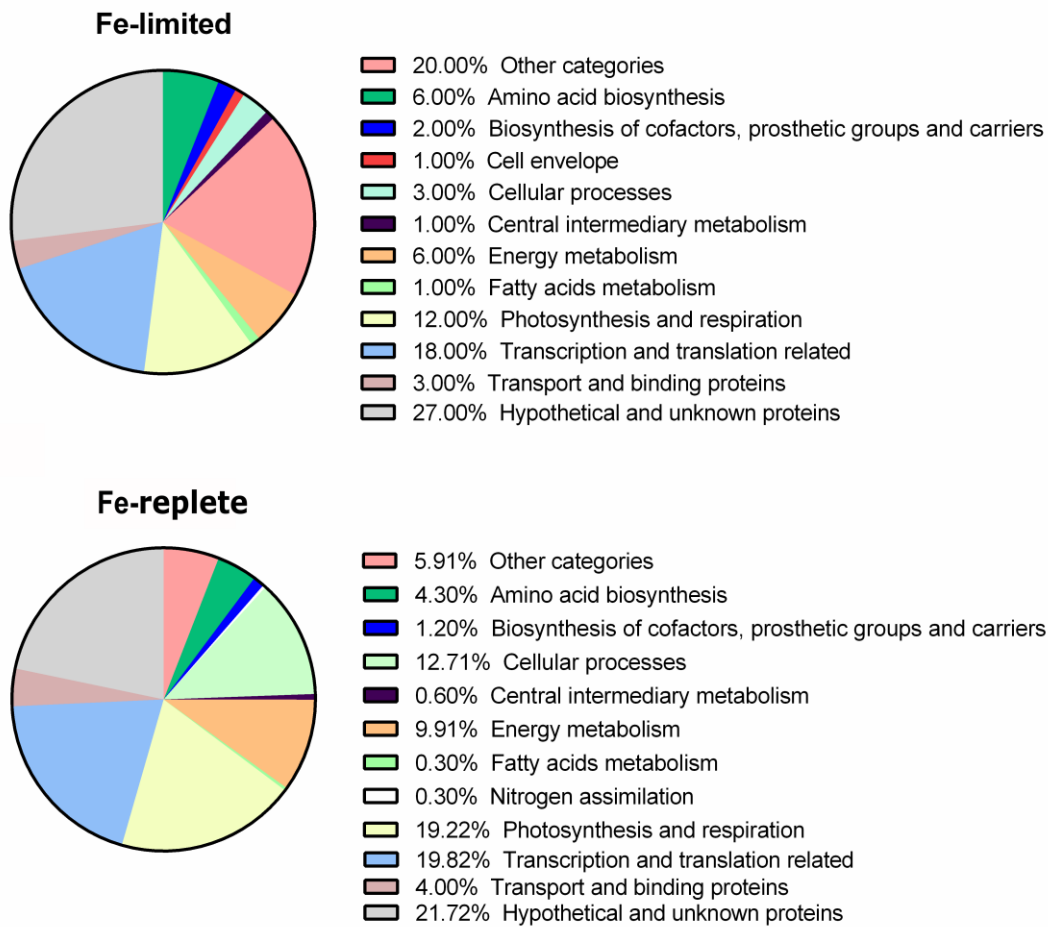

**Figure S2. Core proteins identified in *M. aeruginosa* PCC 7806 under Fe-limited (top) and Fe-replete (bottom) chemostats.** Proteins were assigned into functional groups according to CyanoBase (<http://genome.microbedb.jp/cyanobase>).

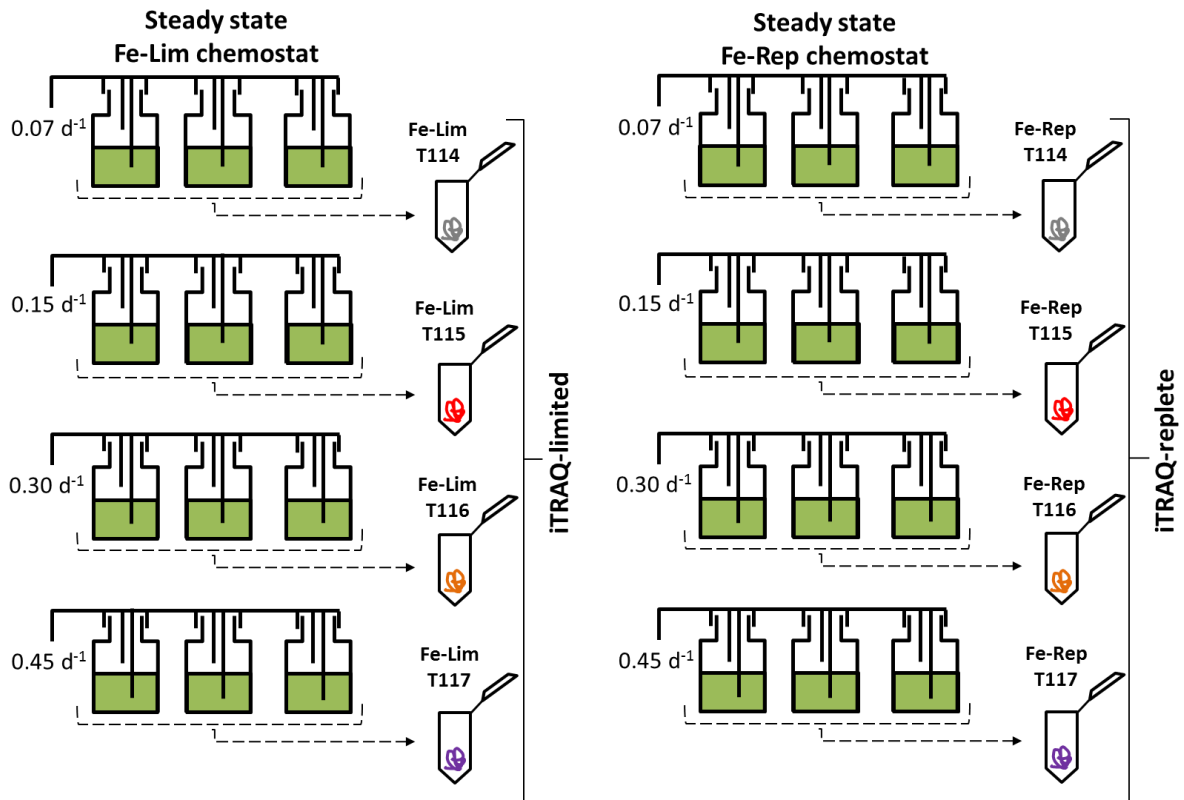

**Figure S3 Summary of iTRAQ experimental design** *M. aeruginosa* were cultured in chemostats to steady-state under Fe-limited (100 nM Fe) and Fe-replete (1,000 nM Fe) conditions at four dilution rates. Cells were harvested and protein extraction was carried out on each culture. Biological replicates were pooled for iTRAQ labeling and technical replicates were run for each iTRAQ analysis. The highest dilution rate (0.45 d<sup>-1</sup>; T117) was used as the reference condition for each chemostat.

**Table S1. Retention time and optimal compound dependent parameters for MCVYST analysis by tandem MS**

| Compounds        | RT (min) | MRM transitions                                           | MRM Ratio        | DP  | CE                | CXP            |
|------------------|----------|-----------------------------------------------------------|------------------|-----|-------------------|----------------|
| ENK              | 8        | 570.2 --> 136.1*<br>570.2 --> 120.1<br>570.2 --> 91.1     | 1<br>0.95<br>0.9 | 86  | 73<br>75<br>129   | 24<br>20<br>14 |
| [D-Asp3]MCYST-RR | 8.7      | 512.9 --> 135.1*<br>512.9 --> 103<br>512.9 --> 127.1      | 1<br>0.7<br>0.3  | 91  | 43<br>93<br>67    | 24<br>18<br>22 |
| MCYST-RR         | 8.8      | 519.9 --> 135.1*<br>519.9 --> 103.1<br>519.9 --> 127.1    | 1<br>0.75<br>0.3 | 81  | 43<br>95<br>65    | 24<br>18<br>22 |
| NOD              | 9.7      | 825.4 --> 135.3*<br>825.4 --> 103.1<br>825.4 --> 227      | 1<br>1<br>0.4    | 136 | 83<br>129<br>71   | 22<br>18<br>22 |
| [D-Asp3]MCYST-LR | 10       | 981.4 --> 135.1*<br>981.4 --> 127.2<br>981.4 --> 103.1    | 1<br>0.5<br>0.3  | 136 | 101<br>127<br>129 | 22<br>20<br>16 |
| MCYST-YR         | 10.1     | 1045.4 --> 135.1*<br>1045.4 --> 127.1<br>1045.4 --> 213   | 1<br>0.4<br>0.25 | 156 | 103<br>125<br>83  | 22<br>22<br>22 |
| MCYST-LR         | 10.2     | 995.5 --> 135.2*<br>995.5 --> 127<br>995.5 --> 213.1      | 1<br>0.55<br>0.5 | 161 | 101<br>129<br>87  | 8<br>22<br>12  |
| MCYST-LA         | 16.4     | 910.5 --> 776.3*<br>910.5 --> 135.3<br>910.5 --> 213.1    | 1<br>0.65<br>0.3 | 96  | 29<br>87<br>67    | 12<br>22<br>18 |
| MCYST-LW         | 18.9     | 1025.3 --> 135.2*<br>1025.3 --> 891.4<br>1025.3 --> 213.1 | 1<br>0.75<br>0.5 | 116 | 93<br>33<br>77    | 22<br>28<br>12 |
| MCYST-LF         | 19.9     | 986.4 --> 135.1*<br>986.4 --> 852.4<br>986.4 --> 213.1    | 1<br>0.7<br>0.2  | 111 | 95<br>31<br>75    | 24<br>26<br>12 |

\*Main MRM transition for quantitative determination. Retention time (RT); Collision energy (CE)

**Table S2. Mobile phase gradient for LC analysis of MCYST samples**

| Total time (min) | Mobile phase A (%) | Mobile phase B (%) |
|------------------|--------------------|--------------------|
| 5*               | 95                 | 5                  |
| 0                | 95                 | 5                  |
| 0.2              | 95                 | 5                  |
| 12               | 30                 | 70                 |
| 14               | 25                 | 75                 |
| 21               | 15                 | 85                 |
| 23               | 95                 | 5                  |

\*Pre-equilibrium time before injection

**Table S3. Optimal MS operating parameters for MCVST analysis**

| Instrument Model        | AB Sciex Instruments 4000Q TRAP LC-MS/MS |
|-------------------------|------------------------------------------|
| Parameter               | Setting Value                            |
| Curtain Gas (CUR)       | 12 (psig)                                |
| Temperature (TEM)       | 600 (°C)                                 |
| Nebuliser gas (GS1)     | 40 (psig)                                |
| Turbo gas (GS2)         | 35 (psig)                                |
| Interface Heater (ihe)  | ON                                       |
| Collision Gas (CAD)     | High Mode                                |
| IonSpray Voltage (IS)   | 4500 (kV)                                |
| Entrance Potential (EP) | 10                                       |
| MRM Scan Window         | 360 (sec)                                |
| Target Scan Time*       | 1.6 (sec)                                |

\*Target scan time should be set at somewhat value so that each analyte peak comprises 9-14 data points

**Table S4. Summary of ANOVA statistics for MCVYST comparisons between dilution rates.**

|                                        |                                                              |                   |                   |          |                  |
|----------------------------------------|--------------------------------------------------------------|-------------------|-------------------|----------|------------------|
|                                        | Compare each cell mean with the other cell mean in that row. |                   |                   |          |                  |
|                                        | Number of families                                           | 1                 |                   |          |                  |
|                                        | Number of comparisons per family                             | 4                 |                   |          |                  |
|                                        | Alpha                                                        | 0.05              |                   |          |                  |
|                                        | Sidak's multiple comparisons test                            | Mean Diff.        | 95% CI of diff.   | Summary  | Adjusted P Value |
| Total $Q_{\text{MCYST}}$               | Control vs. Fe-limited                                       |                   |                   |          |                  |
|                                        | 0.45                                                         | -44.61            | -69.43 to -19.80  | ***      | 0.0005           |
|                                        | 0.30                                                         | -44.02            | -68.83 to -19.20  | ***      | 0.0006           |
|                                        | 0.15                                                         | -22.04            | -46.85 to 2.770   | ns       | 0.093            |
| Fe-Replete $\text{MCYST}_{\text{int}}$ | [D-Asp3]MCYST-LR vs. MCVYST-LR                               |                   |                   |          |                  |
|                                        | 0.45                                                         | -11.97            | -24.10 to 0.1513  | ns       | 0.0537           |
|                                        | 0.30                                                         | -16.24            | -28.37 to -4.119  | **       | 0.0069           |
|                                        | 0.15                                                         | -22.99            | -35.12 to -10.86  | ***      | 0.0003           |
| 0.07                                   | -27.7                                                        | -39.82 to -15.57  | ****              | < 0.0001 |                  |
| Fe-Limited $\text{MCYST}_{\text{int}}$ | [D-Asp3]MCYST-LR vs. MCVYST-LR                               |                   |                   |          |                  |
|                                        | 0.45                                                         | -26.78            | -43.88 to -9.684  | **       | 0.0018           |
|                                        | 0.30                                                         | -34.8             | -51.90 to -17.70  | ***      | 0.0001           |
|                                        | 0.15                                                         | -32.44            | -49.54 to -15.34  | ***      | 0.0003           |
| 0.07                                   | -29.62                                                       | -46.72 to -12.52  | ***               | 0.0007   |                  |
| Fe-Limited $\text{MCYST}_{\text{ext}}$ | [D-Asp3]MCYST-LR vs. MCVYST-LR                               |                   |                   |          |                  |
|                                        | 0.45                                                         | -0.2533           | -0.7143 to 0.2076 | ns       | 0.4603           |
|                                        | 0.30                                                         | -0.3133           | -0.7743 to 0.1476 | ns       | 0.2673           |
|                                        | 0.15                                                         | -0.59             | -1.051 to -0.1290 | **       | 0.0098           |
| 0.07                                   | -0.9667                                                      | -1.428 to -0.5057 | ****              | < 0.0001 |                  |



**Table S5. Differentially expressed proteins in *M. aeruginosa* under Fe-limitation at different dilution rates.** Values highlighted in red represent down-regulation while those highlighted in green represent up-regulation of the protein relative to the 0.45 d<sup>-1</sup> (control) condition.

| Accession                          | Protein ID                                                       | 0.07 d <sup>-1</sup> | <i>P</i> val | Log2 fold | 0.15 d <sup>-1</sup> | <i>P</i> val | Log2 fold | 0.30 d <sup>-1</sup> | <i>P</i> val | Log2 fold |
|------------------------------------|------------------------------------------------------------------|----------------------|--------------|-----------|----------------------|--------------|-----------|----------------------|--------------|-----------|
| Energy metabolism (Photosynthesis) |                                                                  |                      |              |           |                      |              |           |                      |              |           |
| MAE_10270                          | Allophycocyanin subunit alpha ( <i>apcA</i> )                    | 0.912                | 0.0377       | -0.133    |                      |              |           |                      |              |           |
| MAE_10260                          | Allophycocyanin subunit beta ( <i>apcB</i> )                     |                      |              |           | 0.215                | 0.0348       | -2.219    |                      |              |           |
| MAE_10240                          | Phycobilisome small core linker polypeptide ( <i>apcC</i> )      | 0.209                | 0.0107       | -2.259    | 0.146                | 0.0182       | -2.771    |                      |              |           |
| MAE_49370                          | Phycobilisome core-membrane linker polypeptide ( <i>apcE</i> )   | 0.209                | 0.0001       | -2.259    | 0.256                | 0.0001       | -1.967    | 0.483                | 0.0001       | -1.050    |
| MAE_21640                          | Phycobilisome core component ( <i>apcF</i> )                     |                      |              |           | 0.497                | 0.0266       | -1.010    |                      |              |           |
| MAE_24460                          | Phycocyanin alpha subunit PCA ( <i>cpcA1</i> )                   | 0.840                | 0.0430       | -0.253    |                      |              |           |                      |              |           |
| MAE_48340                          | Phycobilisome rod-core linker polypeptide ( <i>cpcG</i> )        |                      |              |           | 0.302                | 0.0204       | -1.727    | 2.249                | 0.0003       | 1.169     |
| MAE_10220                          | Photosystem II protein D1 Precursor ( <i>psbA1</i> )             | 0.107                | 0.0195       | -3.229    | 0.194                | 0.0118       | -2.365    |                      |              |           |
| MAE_32990                          | Photosystem II core light harvesting protein ( <i>psbB</i> )     |                      |              |           | 0.078                | 0.0003       | -3.681    |                      |              |           |
| MAE_44250                          | Photosystem II manganese-stabilizing polypeptide ( <i>psbO</i> ) | 0.030                | 0.0011       | -5.076    |                      |              |           |                      |              |           |
| MAE_50080                          | Photosystem II extrinsic protein ( <i>psbQ</i> )                 |                      |              |           | 4.055                | 0.0116       | 2.020     |                      |              |           |
| MAE_36490                          | Photosystem II complex extrinsic protein U ( <i>PsbU</i> )       |                      |              |           | 3.802                |              | 1.927     |                      |              |           |
| MAE_47560                          | Photosystem I P700 chlorophyll a apoprotein A1 ( <i>psaA</i> )   | 0.145                | 0.0010       | -2.790    | 0.132                | 0.0003       | -2.923    |                      |              |           |
| MAE_47570                          | Photosystem I P700 chlorophyll a apoprotein A2 ( <i>psaB</i> )   | 0.082                | 0.0048       | -3.601    |                      |              |           | 0.328                | 0.0422       | -1.608    |

|                                                            |                                                                                        |       |        |        |       |        |        |       |        |        |
|------------------------------------------------------------|----------------------------------------------------------------------------------------|-------|--------|--------|-------|--------|--------|-------|--------|--------|
| MAE_23300                                                  | Photosystem I subunit II ( <i>psaD</i> )                                               | 0.078 | 0.0001 | -3.681 | 0.083 | 0.0001 | -3.588 |       |        |        |
| MAE_47290                                                  | Photosystem I subunit III ( <i>psaF</i> )                                              | 0.066 | 0.0050 | -3.920 | 0.387 | 0.0475 | -1.369 |       |        |        |
| MAE_43690                                                  | Photosystem I subunit XI ( <i>psaL</i> )                                               | 6.138 | 0.0441 | 2.618  |       |        |        |       |        |        |
| MAE_09490                                                  | Photosystem I subunit XII ( <i>psaM</i> )                                              | 0.209 | 0.0148 | -2.259 | 0.047 | 0.0011 | -4.398 |       |        |        |
| MAE_19230                                                  | Apocytochrome f ( <i>petA</i> )                                                        |       |        |        | 2.128 | 0.0270 | 1.090  |       |        |        |
| MAE_12570                                                  | Ferredoxin-NADP oxidoreductase ( <i>petH</i> )                                         | 0.177 | 0.0033 | -2.498 | 0.387 | 0.0058 | -1.369 |       |        |        |
| MAE_50160                                                  | F0F1 ATP synthase subunit alpha ( <i>atpA</i> )                                        |       |        |        | 0.189 | 0.0004 | -2.405 |       |        |        |
| MAE_50150                                                  | F0F1 ATP synthase subunit delta ( <i>atpD</i> )                                        | 0.347 | 0.0307 | -1.528 |       |        |        |       |        |        |
| MAE_50130                                                  | F0F1 ATP synthase subunit B' ( <i>atpG</i> )                                           | 0.120 | 0.0015 | -3.056 |       |        |        |       |        |        |
| Energy metabolism (C-fixation and carbohydrate metabolism) |                                                                                        |       |        |        |       |        |        |       |        |        |
| MAE_47890                                                  | Ribulose biphosphate carboxylase large chain (RubisCo large subunit) ( <i>rbcL</i> )   | 0.069 | 0.0001 | -3.867 | 0.108 | 0.0062 | -3.242 | 0.506 | 0.0029 | -0.983 |
| MAE_47870                                                  | Ribulose biphosphate carboxylase small subunit (RubisCo small subunit) ( <i>rbcS</i> ) | 0.055 | 0.0002 | -4.186 |       |        |        | 0.492 | 0.0284 | -1.023 |
| MAE_25030                                                  | NAD(P)-dependent glyceraldehyde-3-phosphate dehydrogenase                              | 0.409 | 0.0134 | -1.289 | 0.147 | 0.0001 | -2.764 | 0.479 | 0.0089 | -1.063 |
| MAE_38450                                                  | Phosphoribulokinase ( <i>prK</i> )                                                     |       |        |        | 0.126 | 0.0092 | -2.990 |       |        |        |
| MAE_47930                                                  | Carbon dioxide concentrating mechanism protein K ( <i>ccmK1</i> )                      |       |        |        | 4.488 | 0.0051 | 2.166  |       |        |        |
| MAE_47910                                                  | Carbon dioxide concentrating mechanism protein ( <i>ccmM</i> )                         | 0.215 | 0.0433 | -2.219 |       |        |        |       |        |        |
| MAE_50050                                                  | PHA-specific acetoacetyl-CoA reductase ( <i>phaB</i> )                                 | 5.346 | 0.0438 | 2.418  | 6.668 | 0.0146 | 2.737  |       |        |        |
| MAE_02620                                                  | Phosphoenolpyruvate synthase ( <i>ppsA</i> )                                           | 2.535 | 0.0084 | 1.342  | 1.380 | 0.0241 | 0.465  | 1.294 | 0.0276 | 0.372  |
| MAE_54130                                                  | 4-alpha-glucanotransferase                                                             |       |        |        |       |        |        | 0.347 | 0.0332 | -1.528 |
| MAE_20180                                                  | Glycogen phosphorylase ( <i>glgP</i> )                                                 |       |        |        | 0.187 | 0.0001 | -2.418 | 0.575 | 0.0158 | -0.797 |
| MAE_35090                                                  | Enolase phosphopyruvate hydratase ( <i>eno</i> )                                       |       |        |        |       |        |        | 1.923 | 0.0021 | 0.943  |
| MAE_34890                                                  | Glyceraldehyde 3-phosphate dehydrogenase, type 1 ( <i>gap1</i> )                       | 0.308 | 0.0069 | -1.701 | 0.075 | 0.0000 | -3.747 |       |        |        |

|                       |                                                                              |       |        |        |        |        |        |       |               |
|-----------------------|------------------------------------------------------------------------------|-------|--------|--------|--------|--------|--------|-------|---------------|
| MAE_30020             | Fructose-1,6-/sedoheptulose-1,7-bisphosphatase ( <i>glpX</i> )               | 0.258 | 0.0003 | -1.953 |        |        |        |       |               |
| MAE_32470             | Fructose-1,6-bisphosphate aldolase ( <i>fbaA</i> )                           | 0.340 | 0.0266 | -1.555 | 0.322  | 0.0036 | -1.634 |       |               |
| MAE_52710             | 6-phosphofructokinase ( <i>pfkAI</i> )                                       | 0.054 | 0.0370 | -4.212 |        |        |        |       |               |
| MAE_14970             | Transketolase with thiamine and pyrimidine binding domains                   | 0.132 | 0.0001 | -2.923 | 0.466  | 0.0016 | -1.103 |       |               |
| MAE_61820             | Transketolase with TktA domain                                               | 0.179 | 0.0146 | -2.485 | 0.114  | 0.0010 | -3.136 | 0.570 | 0.0377 -0.811 |
| MAE_34870             | D-xylulose 5-phosphate/D-fructose 6-phosphate phosphoketolase family protein | 0.191 | 0.0203 | -2.392 |        |        |        |       |               |
| MAE_43640             | Glucose 6-phosphate dehydrogenase ( <i>zwf</i> )                             |       |        |        | 0.084  | 0.0068 | -3.574 |       |               |
| MAE_14900             | NADH-dependent glutamate synthase small subunit ( <i>gltD</i> )              |       |        |        | 0.325  | 0.0390 | -1.621 |       |               |
| MAE_09050             | Glutamate--ammonia ligase ( <i>glnN</i> )                                    | 0.096 | 0.0083 | -3.375 |        |        |        |       |               |
| MAE_07560             | NADH-dependent glutamate synthase large subunit ( <i>gltB</i> )              | 0.116 | 0.0012 | -3.109 | 0.1960 | 0.0042 | -2.352 |       |               |
| Amino acid metabolism |                                                                              |       |        |        |        |        |        |       |               |
| MAE_59440             | Diaminopimelate epimerase ( <i>dapF</i> )                                    | 0.847 | 0.0053 | -0.239 | 0.705  | 0.0180 | -0.505 |       |               |
| MAE_01980             | Aldehyde dehydrogenase ( <i>aldH</i> )                                       |       |        |        | 0.189  | 0.0473 | -2.405 |       |               |
| MAE_50250             | S-adenosyl-L-homocysteine hydrolase adenosylhomocysteinase                   | 0.175 | 0.0000 | -2.511 | 0.215  | 0.0000 | -2.219 |       |               |
| MAE_45970             | S-adenosylmethionine synthetase ( <i>metK</i> )                              | 0.097 | 0.0322 | -3.362 |        |        |        |       |               |
| MAE_50420             | Carbamoyl phosphate synthase large subunit ( <i>carB</i> ) pyrA?             |       |        |        | 0.461  | 0.0093 | -1.116 | 0.766 | 0.0254 -0.385 |
| MAE_35390             | Aspartate aminotransferase ( <i>aspC</i> )                                   |       |        |        | 5.702  | 0.0000 | 2.511  | 1.995 | 0.0463 0.997  |
| MAE_15720             | Acetylornithine aminotransferase ( <i>argD</i> )                             |       |        |        | 4.131  | 0.0023 | 2.046  |       |               |
| MAE_60310             | Cysteine syntase ( <i>cysK</i> )                                             |       |        |        | 6.310  | 0.0144 | 2.656  |       |               |
| MAE_62000             | Leucyl aminopeptidase ( <i>pepA</i> )                                        |       |        |        | 2.630  | 0.0055 | 1.395  |       |               |
| MAE_32670             | Glycine cleavage system protein H ( <i>gcvH</i> )                            |       |        |        | 5.916  | 0.0499 | 2.565  |       |               |

|                                                                         |                                                                                            |       |        |        |        |        |       |        |        |        |
|-------------------------------------------------------------------------|--------------------------------------------------------------------------------------------|-------|--------|--------|--------|--------|-------|--------|--------|--------|
| MAE_39110                                                               | Branched-chain amino acid aminotransferase ( <i>ilvE</i> )                                 |       |        |        | 7.379  | 0.0026 | 2.883 |        |        |        |
| MAE_28670                                                               | Dihydroxy-acid dehydratase ( <i>ilvD</i> )                                                 |       |        |        | 5.346  | 0.0000 | 2.418 | 1.871  | 0.0440 | 0.904  |
| Cellular processes                                                      |                                                                                            |       |        |        |        |        |       |        |        |        |
| MAE_46050                                                               | CP12 polypeptide fused with CBS domain                                                     |       |        |        |        |        |       | 0.2560 | 0.0048 | -1.967 |
| MAE_62780                                                               | Putative peroxiredoxin                                                                     | 0.053 | 0.0450 | -4.239 |        |        |       |        |        |        |
| MAE_36510                                                               | Peroxiredoxin                                                                              | 0.157 | 0.0009 | -2.671 |        |        |       |        |        |        |
| MAE_48380                                                               | Universal stress protein UspA homolog                                                      | 0.121 | 0.0452 | -3.043 |        |        |       |        |        |        |
| MAE_02790                                                               | Thioredoxin ( <i>trxA</i> )                                                                |       |        |        | 3.133  | 0.0014 | 1.648 |        |        |        |
| MAE_22850                                                               | Delta-aminolevulinic acid dehydratase ( <i>hemB</i> )                                      |       |        |        | 8.472  | 0.0152 | 3.083 |        |        |        |
| MAE_62840                                                               | DNA starvation/stationary phase protection protein Dps / DNA-binding ferritin-like protein |       |        |        | 5.650  | 0.0038 | 2.498 |        |        |        |
| MAE_60930                                                               | Bacterioferritin comigratory protein                                                       |       |        |        | 3.162  | 0.0001 | 1.661 |        |        |        |
| MAE_53990                                                               | Iron/manganese superoxide dismutase ( <i>sodB</i> )                                        |       |        |        | 5.248  | 0.0016 | 2.392 |        |        |        |
| MAE_16920                                                               | Superoxide dismutase ( <i>sodB</i> )                                                       |       |        |        | 13.062 | 0.0197 | 3.707 |        |        |        |
| gi 159028112                                                            | Flavodoxin ( <i>isiB</i> )                                                                 | 3.162 | 0.0006 | 1.661  |        |        |       | 2.421  | 0.0057 | 1.276  |
| Transport and binding proteins                                          |                                                                                            |       |        |        |        |        |       |        |        |        |
| MAE_39210                                                               | Chloroplastic outer envelope membrane protein homolog                                      | 3.531 | 0.0442 | 1.820  | 7.586  | 0.0013 | 2.923 | 4.246  | 0.0097 | 2.086  |
| MAE_14800                                                               | Nitrate/nitrite transport protein ( <i>nrtA</i> )                                          | 3.373 | 0.0002 | 1.754  | 7.586  | 0.0000 | 2.923 | 2.377  | 0.0121 | 1.249  |
| MAE_06220                                                               | ABC-type urea transport system substrate-binding protein                                   |       |        |        | 15.704 | 0.0000 | 3.973 |        |        |        |
| MAE_56680                                                               | Iron transport system substrate-binding protein                                            | 5.754 | 0.0000 | 2.525  | 8.551  | 0.0000 | 3.096 | 1.754  | 0.9975 | 0.811  |
| MAE_47420                                                               | Extracellular solute-binding protein                                                       |       |        |        | 2.911  | 0.0081 | 1.541 |        |        |        |
| Genetic information processing - Transcription and translation proteins |                                                                                            |       |        |        |        |        |       |        |        |        |

|              |                                                                                                                                   |        |        |        |        |        |        |       |        |        |
|--------------|-----------------------------------------------------------------------------------------------------------------------------------|--------|--------|--------|--------|--------|--------|-------|--------|--------|
| MAE_46070    | 10 kDa chaperonin, co-chaperonin GroES ( <i>groS</i> )                                                                            |        |        |        | 1.787  | 0.0431 | 0.837  |       |        |        |
| gi 159027173 | Metallothionein ( <i>smtA</i> )                                                                                                   |        |        |        | 15.996 | 0.0014 | 4.000  |       |        |        |
| MAE_02510    | RNA-binding protein                                                                                                               | 8.954  | 0.0262 | 3.163  | 17.378 | 0.0028 | 4.119  |       |        |        |
| MAE_45870    | RNA-binding region protein ( <i>rbpF/A2</i> )                                                                                     | 14.859 | 0.0272 | 3.893  | 19.953 | 0.0190 | 4.319  | 9.550 | 0.0442 | 3.256  |
| MAE_30540    | Ribosome recycling factor ( <i>frr</i> )                                                                                          |        |        |        | 2.291  | 0.0256 | 1.196  |       |        |        |
| MAE_03930    | Aspartyl/glutamyl-tRNA amidotransferase subunit B ( <i>gatB</i> )                                                                 |        |        |        | 0.123  | 0.0146 | -3.030 |       |        |        |
| MAE_62700    | Trigger factor ( <i>tig</i> )                                                                                                     |        |        |        | 0.227  | 0.0381 | -2.139 |       |        |        |
| MAE_61840    | ClpB protein                                                                                                                      |        |        |        | 0.738  | 0.0368 | -0.439 | 0.718 | 0.0230 | -0.478 |
| MAE_57190    | ATP-dependent Clp protease-like protein                                                                                           |        |        |        | 0.139  | 0.0041 | -2.844 |       |        |        |
| MAE_46080    | 60 kDa chaperonin GroEL1 ( <i>groEL1</i> )                                                                                        | 0.146  | 0.0313 | -2.777 | 0.425  | 0.0373 | -1.236 |       |        |        |
| MAE_03410    | 60 kDa chaperonin GroEL2 ( <i>groEL2</i> )                                                                                        | 0.229  | 0.0063 | -2.126 |        |        |        |       |        |        |
| MAE_62320    | Bifunctional phosphoribosyl aminoimidazole carboxy formyl formyltransferase / inosinemonophosphate cyclohydrolase ( <i>purH</i> ) |        |        |        | 0.297  | 0.0437 | -1.754 |       |        |        |
| MAE_13690    | Transcriptional regulator (AbrB family)                                                                                           | 0.223  | 0.0196 | -2.166 |        |        |        |       |        |        |
| MAE_54500    | DNA-directed RNA polymerase beta subunit ( <i>rpoB</i> )                                                                          |        |        |        | 0.143  | 0.0352 | -2.804 |       |        |        |
| MAE_11110    | DNA-directed RNA polymerase subunit gamma ( <i>rpoC1</i> )                                                                        |        |        |        | 0.116  | 0.0358 | -3.109 |       |        |        |
| MAE_42760    | Elongation factor ( <i>tuf</i> )                                                                                                  | 0.227  | 0.0187 | -2.139 | 0.061  | 0.0000 | -4.034 | 0.515 | 0.0248 | -0.957 |
| MAE_43910    | 30S ribosomal protein S1                                                                                                          | 0.311  | 0.0146 | -1.688 | 0.194  | 0.0023 | -2.365 |       |        |        |
| MAE_57370    | 30S ribosomal protein S3 ( <i>rpsC</i> )                                                                                          |        |        |        | 0.077  |        | -3.694 |       |        |        |
| MAE_32430    | 30S ribosomal protein S4 ( <i>rpsD</i> )                                                                                          |        |        |        | 0.286  | 0.0031 | -1.807 |       |        |        |
| MAE_57270    | 30S ribosomal protein S5 ( <i>rpsE</i> )                                                                                          | 0.281  | 0.0073 | -1.834 | 0.095  | 0.0009 | -3.402 |       |        |        |
| MAE_11310    | 30S ribosomal protein S6                                                                                                          | 0.313  | 0.0078 | -1.674 | 0.182  | 0.0030 | -2.458 |       |        |        |
| MAE_57300    | 30S ribosomal protein S8 ( <i>rpsH</i> )                                                                                          |        |        |        | 0.207  | 0.0025 | -2.272 |       |        |        |

|                  |                                                                     |       |        |        |        |        |        |       |        |        |
|------------------|---------------------------------------------------------------------|-------|--------|--------|--------|--------|--------|-------|--------|--------|
| MAE_52500        | 30S ribosomal protein S9 ( <i>rpsI</i> )                            |       |        |        | 0.087  | 0.0024 | -3.521 |       |        |        |
| MAE_06280        | 30S ribosomal protein S15                                           | 0.041 | 0.0000 | -4.611 |        |        |        |       |        |        |
| MAE_57595        | 30S ribosomal protein S16                                           |       |        |        | 0.236  | 0.0126 | -2.086 |       |        |        |
| MAE_48050        | 30S ribosomal protein S18                                           | 0.219 | 0.3709 | -2.193 | 0.069  | 0.0042 | -3.853 | 0.718 | 0.3355 | -0.478 |
| MAE_43885        | 50S ribosomal protein L7/L12                                        |       |        |        |        |        |        | 0.328 | 0.0306 | -1.608 |
| MAE_36630        | 50S ribosomal protein L1 ( <i>rplA</i> )                            | 0.080 | 0.0021 | -3.641 |        |        |        |       |        |        |
| MAE_57430        | 50S ribosomal protein L3                                            |       |        |        | 0.060  | 0.0032 | -4.066 |       |        |        |
| MAE_57420        | 50S ribosomal protein L4                                            |       |        |        | 0.203  | 0.0224 | -2.299 |       |        |        |
| MAE_43870        | 50S ribosomal protein L10                                           | 0.063 | 0.0015 | -4.000 | 0.550  | 0.0500 | -0.864 | 0.291 | 0.0324 | -1.781 |
| MAE_36590        | 50S ribosomal protein L19                                           | 0.302 | 0.0285 | -1.727 | 0.075  | 0.0013 | -3.734 | 0.655 | 0.0455 | -0.611 |
| MAE_52530        | 50S ribosomal protein L17 ( <i>rplQ</i> )                           | 0.136 | 0.0049 | -2.883 |        |        |        |       |        |        |
| MAE_57330        | 50S ribosomal protein L14                                           | 0.261 | 0.0127 | -1.940 | 0.175  | 0.0361 | -2.511 |       |        |        |
| MAE_57260        | 50S ribosomal protein L15 ( <i>rplO</i> )                           | 0.071 | 0.0009 | -3.827 | 0.261  | 0.0036 | -1.940 |       |        |        |
| MAE_57320        | 50S ribosomal protein L24                                           |       |        |        | 0.067  | 0.0323 | -3.893 |       |        |        |
| Other categories |                                                                     |       |        |        |        |        |        |       |        |        |
| MAE_04080        | Heat shock protein ( <i>grpE</i> )                                  |       |        |        | 2.249  | 0.0147 | 1.169  |       |        |        |
| MAE_21600        | Putative thylakoid-associated protein                               | 3.565 | 0.0085 | 1.834  | 2.965  | 0.0098 | 1.568  | 4.920 | 0.0005 | 2.299  |
| MAE_62060        | Cell division protein FtsH ( <i>ftsH3</i> )                         | 7.244 | 0.0308 | 2.857  |        |        |        |       |        |        |
| MAE_42350        | Subtilisin-like protein peptidase S8 and S53                        | 2.938 | 0.0161 | 1.555  |        |        |        |       |        |        |
| MAE_50430        | Putative modulator of DNA gyrase peptidase U62                      | 7.047 | 0.0128 | 2.817  |        |        |        |       |        |        |
| MAE_37620        | Gas vesicle structural protein ( <i>gvpC</i> )                      |       |        |        | 1.803  | 0.0001 | 0.850  | 1.393 | 0.0019 | 0.478  |
| MAE_61940        | Plasma membrane protein with phage shock protein PspA domain        |       |        |        | 3.105  | 0.0080 | 1.634  | 1.977 | 0.2859 | 0.983  |
| MAE_38380        | Tic22-like protein                                                  | 0.097 | 0.0153 | -3.362 | 2.399  | 0.0018 | 1.262  | 0.745 | 0.4004 | -0.425 |
| MAE_54380        | FKBP-type peptidyl-prolyl cis-trans isomerase ( <i>ytfC</i> )       |       |        |        | 1.660  | 0.0315 | 0.731  |       |        |        |
| MAE_18910        | Orange carotenoid-binding protein /water-soluble carotenoid protein | 0.520 | 0.0173 | -0.943 | 0.2109 | 0.0001 | -2.246 | 0.497 | 0.0071 | -1.010 |

|                       |                                        |        |        |        |        |        |        |        |        |        |
|-----------------------|----------------------------------------|--------|--------|--------|--------|--------|--------|--------|--------|--------|
| MAE_27460             | Cyanophycin synthetase ( <i>cphA</i> ) |        |        |        | 0.236  | 0.0020 | -2.086 |        |        |        |
| MAE_31270             | S-layer region-like precursor protein  | 0.395  | 0.0198 | -1.342 | 0.120  | 0.0031 | -3.056 |        |        |        |
| gi 169788458          | Actin                                  |        |        |        | 0.076  | 0.0330 | -3.721 |        |        |        |
| Hypothetical proteins |                                        |        |        |        |        |        |        |        |        |        |
| gi 159027829          | Hypothetical protein                   | 0.089  | 0.0032 | -3.495 | 0.402  | 0.0032 | -1.316 | 0.560  | 0.0045 | -0.837 |
| gi 159027827          | Hypothetical protein                   |        |        |        | 2.188  | 0.0022 | 1.130  | 1.820  | 0.0183 | 0.864  |
| gi 159030339          | Hypothetical protein                   | 0.053  | 0.0000 | -4.239 |        |        |        |        |        |        |
| gi 159029460          | Hypothetical protein                   | 11.803 | 0.0282 | 3.561  |        |        |        |        |        |        |
| gi 159030907          | Hypothetical protein                   |        |        |        | 4.966  | 0.0081 | 2.312  |        |        |        |
| gi 159029624          | Hypothetical protein                   | 2.780  | 0.0265 | 1.475  |        |        |        |        |        |        |
| MAE_37770             | Hypothetical protein                   | 0.117  | 0.0028 | -3.096 |        |        |        |        |        |        |
| MAE_06000             | Hypothetical protein                   |        |        |        | 10.093 | 0.0000 | 3.335  |        |        |        |
| MAE_47530             | Hypothetical protein                   | 18.880 | 0.0002 | 4.234  |        |        |        | 15.417 | 0.0004 | 3.947  |
| MAE_11600             | Hypothetical protein                   | 0.068  | 0.0010 | -3.880 | 0.425  | 0.011  | -1.236 | 0.692  | 0.0254 | -0.532 |
| MAE_11610             | Hypothetical protein                   | 0.168  | 0.0441 | -2.578 | 0.215  | 0.0035 | -2.219 |        |        |        |
| MAE_61990             | Hypothetical protein                   |        |        |        | 7.798  | 0.0015 | 2.963  |        |        |        |
| MAE_15680             | Hypothetical protein                   | 0.247  | 0.0024 | -2.020 |        |        |        |        |        |        |
| MAE_46700             | Hypothetical protein                   |        |        |        | 6.792  | 0.0023 | 2.764  |        |        |        |
| MAE_07350             | Hypothetical protein                   | 4.875  | 0.0202 | 2.286  | 5.012  | 0.0037 | 2.325  |        |        |        |
| MAE_11840             | Hypothetical protein                   |        |        |        | 0.281  | 0.0412 | -1.834 |        |        |        |
| MAE_07360             | Hypothetical protein                   | 7.871  | 0.0093 | 2.976  | 5.808  | 0.0293 | 2.538  |        |        |        |
| MAE_36690             | Hypothetical protein                   |        |        |        | 4.699  | 0.0250 | 2.232  |        |        |        |
| MAE_02150             | Hypothetical protein                   | 5.861  | 0.0408 | 2.551  | 4.613  | 0.0444 | 2.206  |        |        |        |
| MAE_44430             | Hypothetical protein                   | 5.395  | 0.0255 | 2.432  |        |        |        |        |        |        |
| MAE_41180             | Hypothetical protein                   |        |        |        | 9.818  | 0.0204 | 3.295  | 5.346  | 0.1626 | 2.418  |
| MAE_35080             | Hypothetical protein                   | 0.686  | 0.0428 | -0.545 | 16.904 | 0.0084 | 4.079  | 3.631  | 0.0367 | 1.860  |
| MAE_19620             | Hypothetical protein                   | 5.395  | 0.0425 | 2.432  |        |        |        |        |        |        |

**Table S6. Differentially expressed proteins in *M. aeruginosa* under Fe-repletion at different dilution rates.** Values highlighted in red represent down-regulation while those highlighted in green represent up-regulation of the protein relative to the 0.45 d<sup>-1</sup> (control) condition.

| Accession                                                              | Protein ID                                                      | 0.07 d <sup>-1</sup> | <i>P</i> val | Log2 fold | 0.15 d <sup>-1</sup> | <i>P</i> val | Log2 fold | 0.30 d <sup>-1</sup> | <i>P</i> val | Log2 fold |
|------------------------------------------------------------------------|-----------------------------------------------------------------|----------------------|--------------|-----------|----------------------|--------------|-----------|----------------------|--------------|-----------|
| Genetic information processing -Transcription and translation proteins |                                                                 |                      |              |           |                      |              |           |                      |              |           |
| MAE_42760                                                              | Elongation factor Tu ( <i>tuf</i> )                             |                      |              |           |                      |              |           | 0.273                | 0.0419       | -1.874    |
| MAE_54740                                                              | AbrB family transcriptional regulator                           | 0.263                | 0.0415       | -1.927    |                      |              |           |                      |              |           |
| MAE_49450                                                              | Molecular chaperone ( <i>dnaK</i> )                             | 9.638                | 0.0045       | 3.269     |                      |              |           | 10.186               | 0.0182       | 3.349     |
| gi 488826847                                                           | DNA-binding protein                                             | 0.334                | 0.0223       | -1.581    | 0.227                | 0.0182       | -2.139    |                      |              |           |
| MAE_44930                                                              | 30S ribosomal protein S2                                        |                      |              |           | 0.809                | 0.0306       | -0.306    |                      |              |           |
| Transport and binding proteins                                         |                                                                 |                      |              |           |                      |              |           |                      |              |           |
| gi 488836772                                                           | Iron uptake protein A1                                          | 2.858                | 0.0297       | 1.515     |                      |              |           |                      |              |           |
| Energy metabolism                                                      |                                                                 |                      |              |           |                      |              |           |                      |              |           |
| MAE_07560                                                              | NADH-dependent glutamate synthase large subunit ( <i>gltB</i> ) | 0.299                | 0.0246       | -1.741    |                      |              |           |                      |              |           |
| MAE_10260                                                              | Allophycocyanin subunit beta ( <i>apcB</i> )                    |                      |              |           | 0.453                | 0.0096       | -1.143    |                      |              |           |
| MAE_50150                                                              | ATP synthase ( <i>atpD</i> )                                    |                      |              |           | 0.114                | 0.0044       | -3.136    |                      |              |           |
| gi 488830534                                                           | Putative thylakoid-associated protein                           | 0.196                | 0.0038       | -2.352    |                      |              |           |                      |              |           |
| Other categories                                                       |                                                                 |                      |              |           |                      |              |           |                      |              |           |
| MAE_37620                                                              | Gas vesicle structural protein, GvpC                            | 3.436                | 0.0049       | 1.781     |                      |              |           |                      |              |           |
| Hypothetical proteins                                                  |                                                                 |                      |              |           |                      |              |           |                      |              |           |
| gi 159030339                                                           | Hypothetical protein                                            |                      |              |           | 0.092                | 0.0023       | -3.442    |                      |              |           |
| gi 159030973                                                           | Hypothetical protein                                            | 0.242                | 0.0030       | -2.0463   | 0.084                | 0.0118       | -3.574    | 0.461                | 0.0410       | -1.116    |
